# Supplementary material for: An Intraoral OCT Probe to Enhanced Detection of Approximal Carious Lesions and Assessment of Restorations
Source: PubMed Central journal article supplement (PMC7600310; doi:10.3390/jcm9103257), 2020-10-12

**Figure S1. Work Flow**

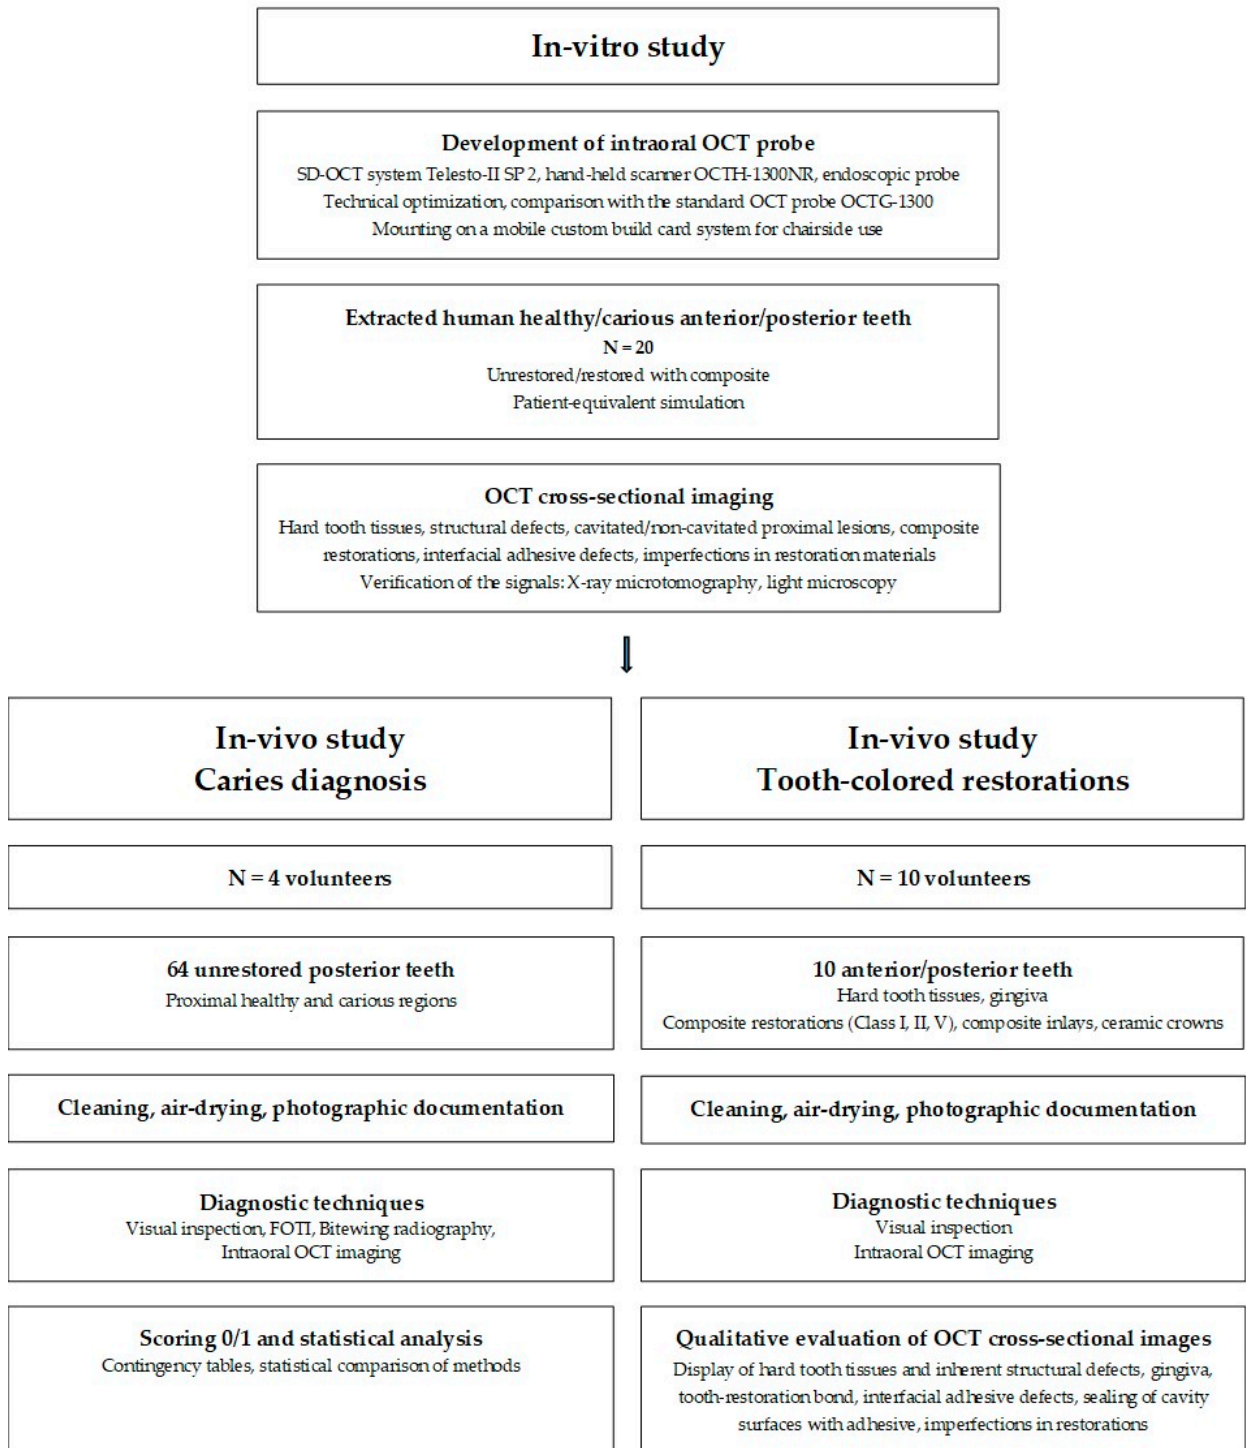

Supplement: jcm-09-03257-s001.pdf [file jcm-09-03257-s001.pdf]
